# Supplementary material for: Diffracting molecular matter-waves at deep-ultraviolet standing-light waves
Source: Royal Society of Chemistry journal article supplement (doi:10.1039/d4cp03059a), 2024-01-01

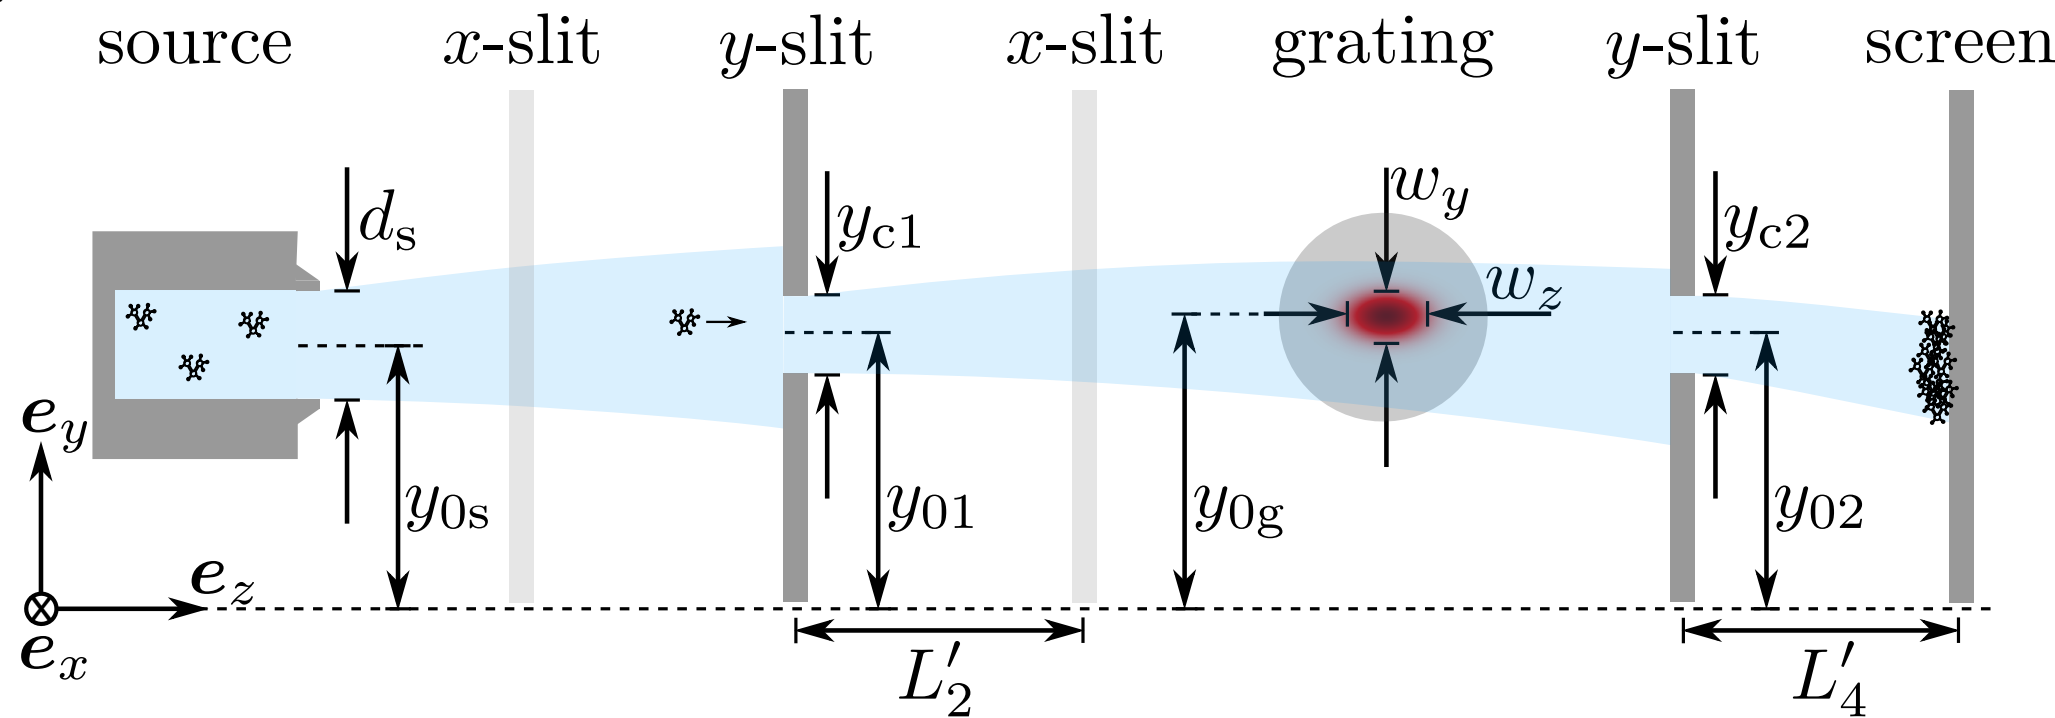

**Top view:**

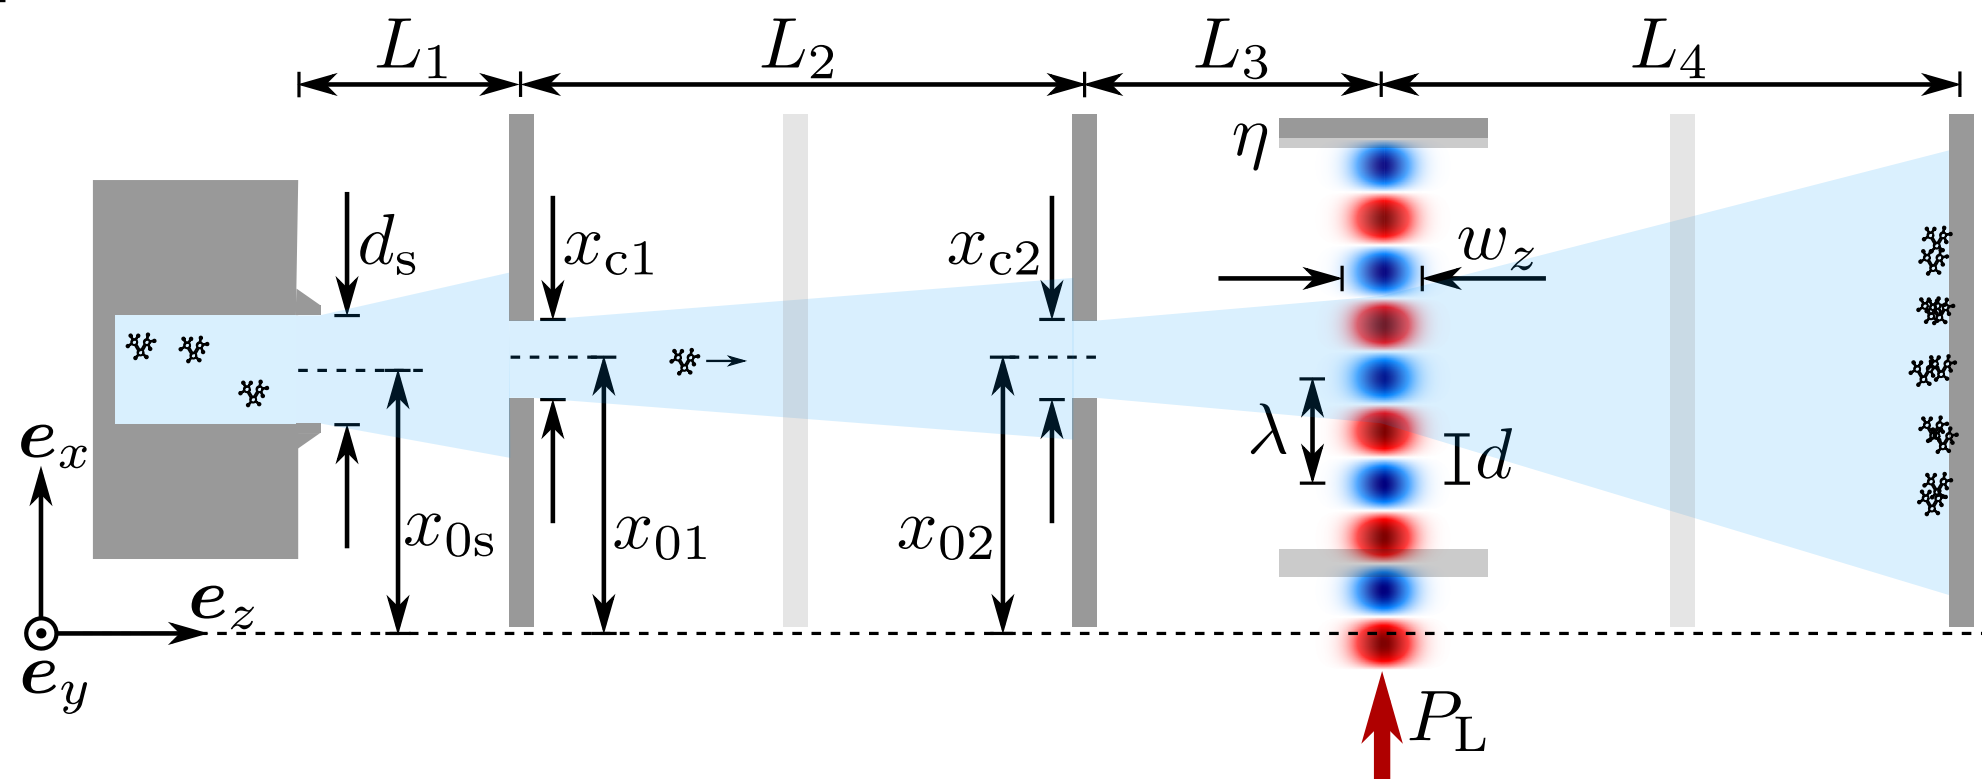

Supplement: d4cp03059a3.pdf [file d4cp03059a3.pdf]
