# Supplementary figures and images for: Diffracting molecular matter-waves at deep-ultraviolet standing-light waves
Source: Royal Society of Chemistry journal article supplement (doi:10.1039/d4cp03059a), 2024-01-01

**Side view:**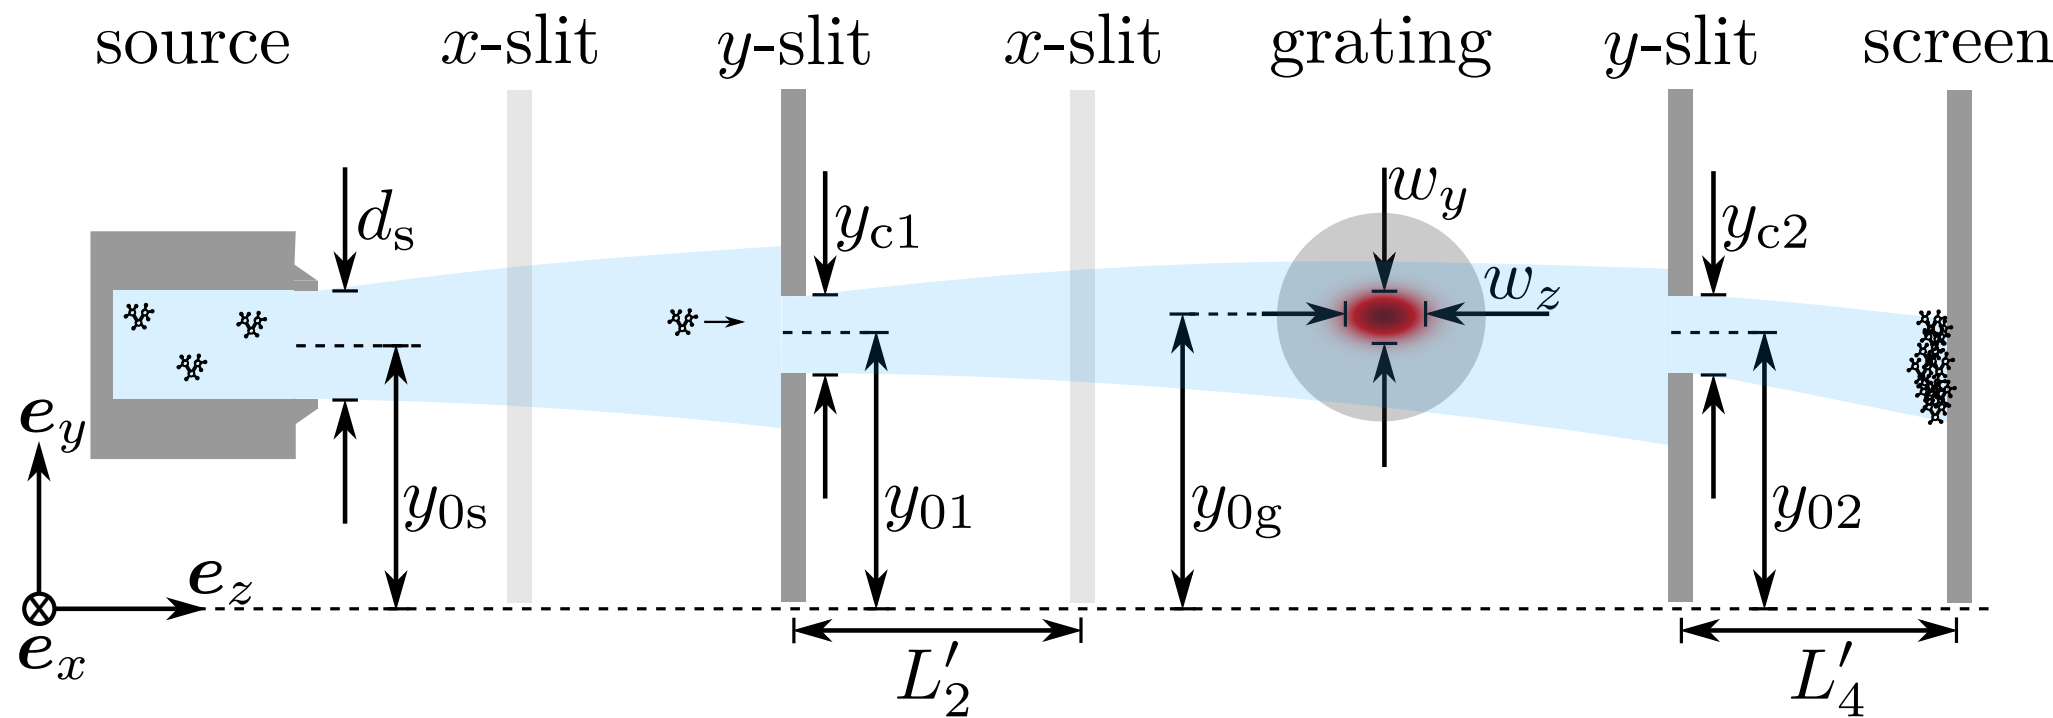**Top view:**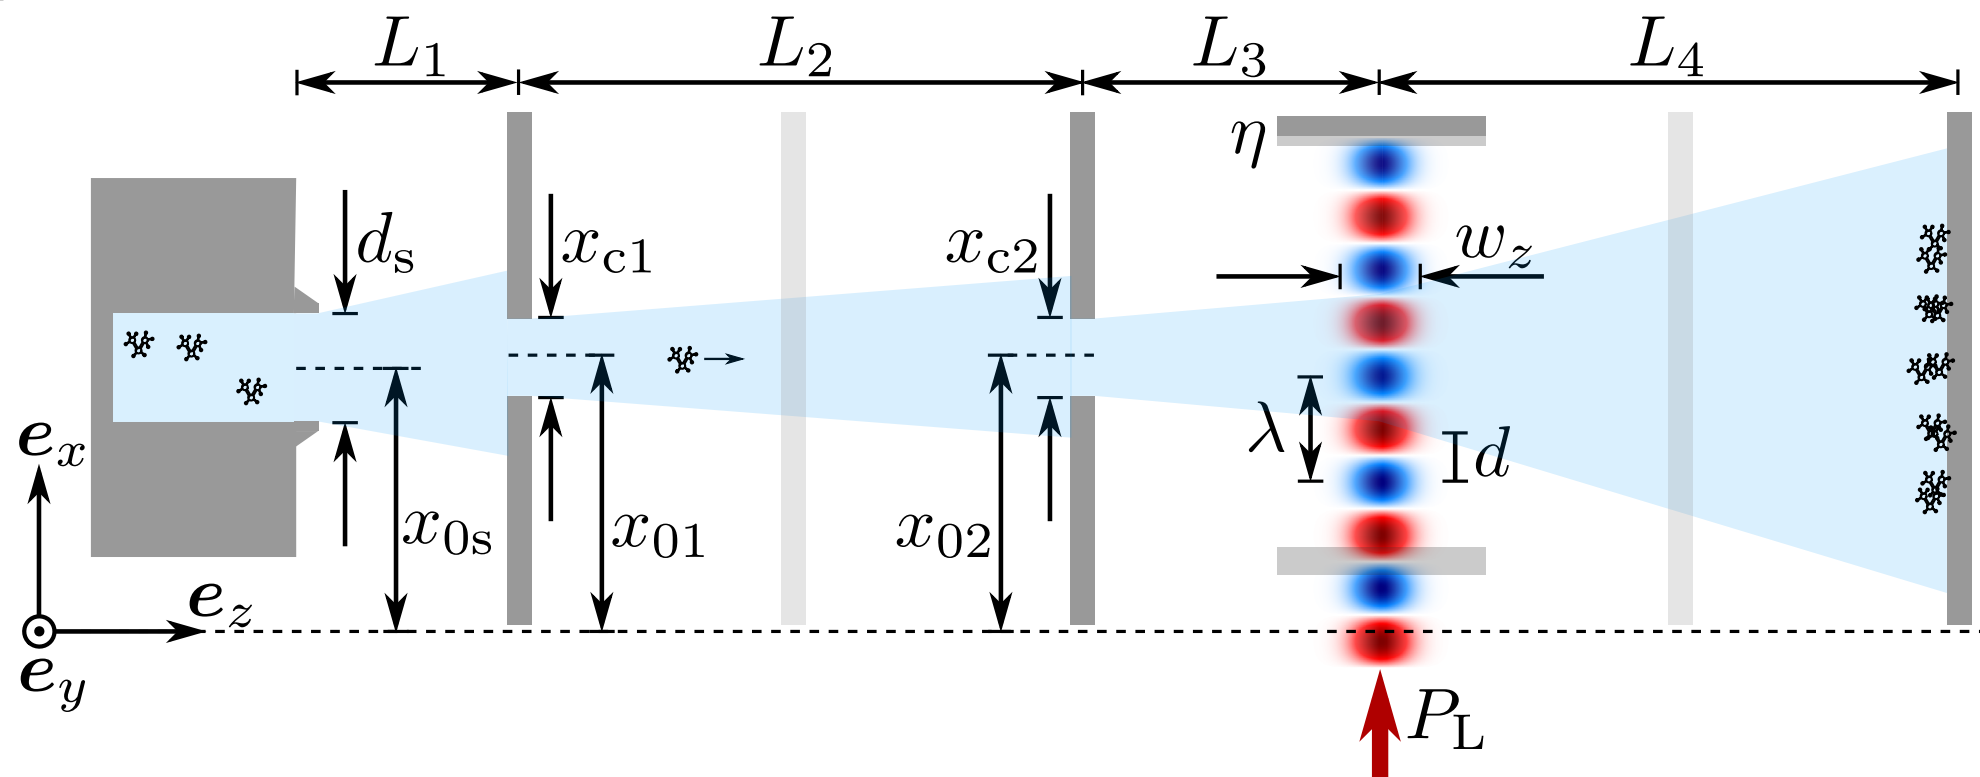

Supplement: d4cp03059a5.zip [file d4cp03059a5.zip]

# MALDI TOF measurements of ZnPc-NBE<sub>4</sub>

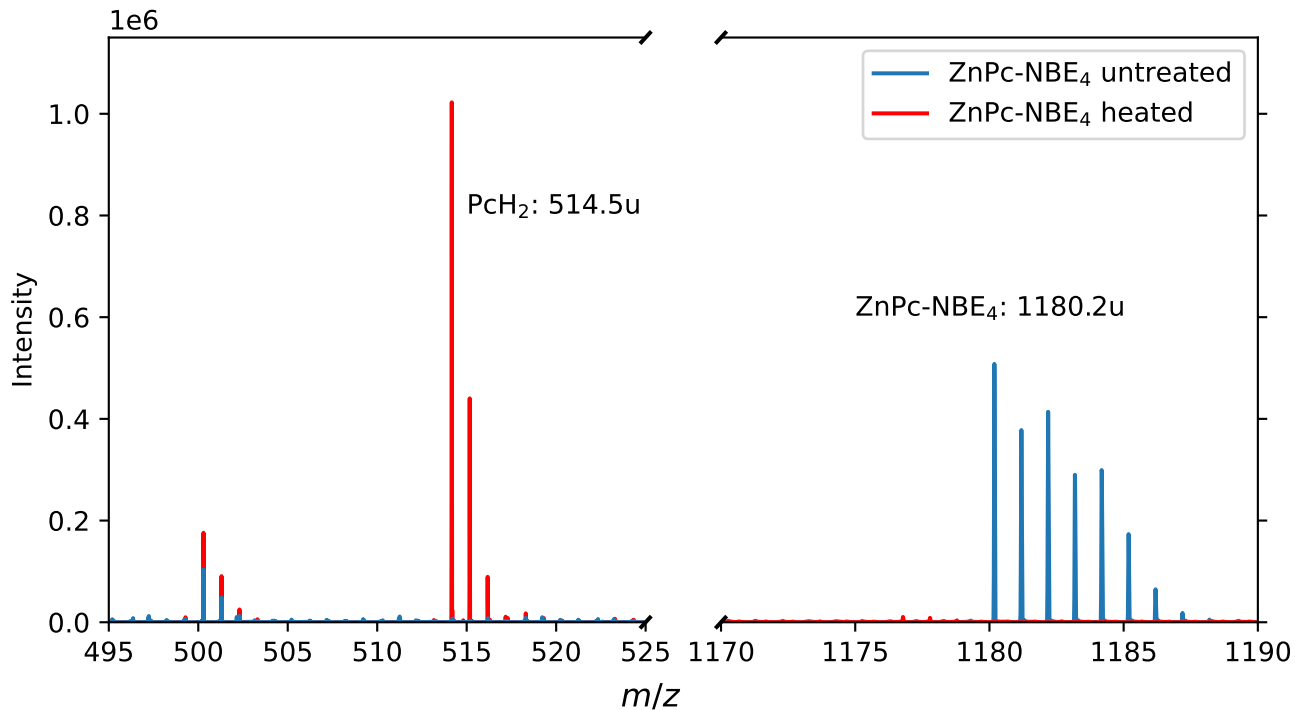

Supplement: d4cp03059a5.zip [file d4cp03059a5.zip]

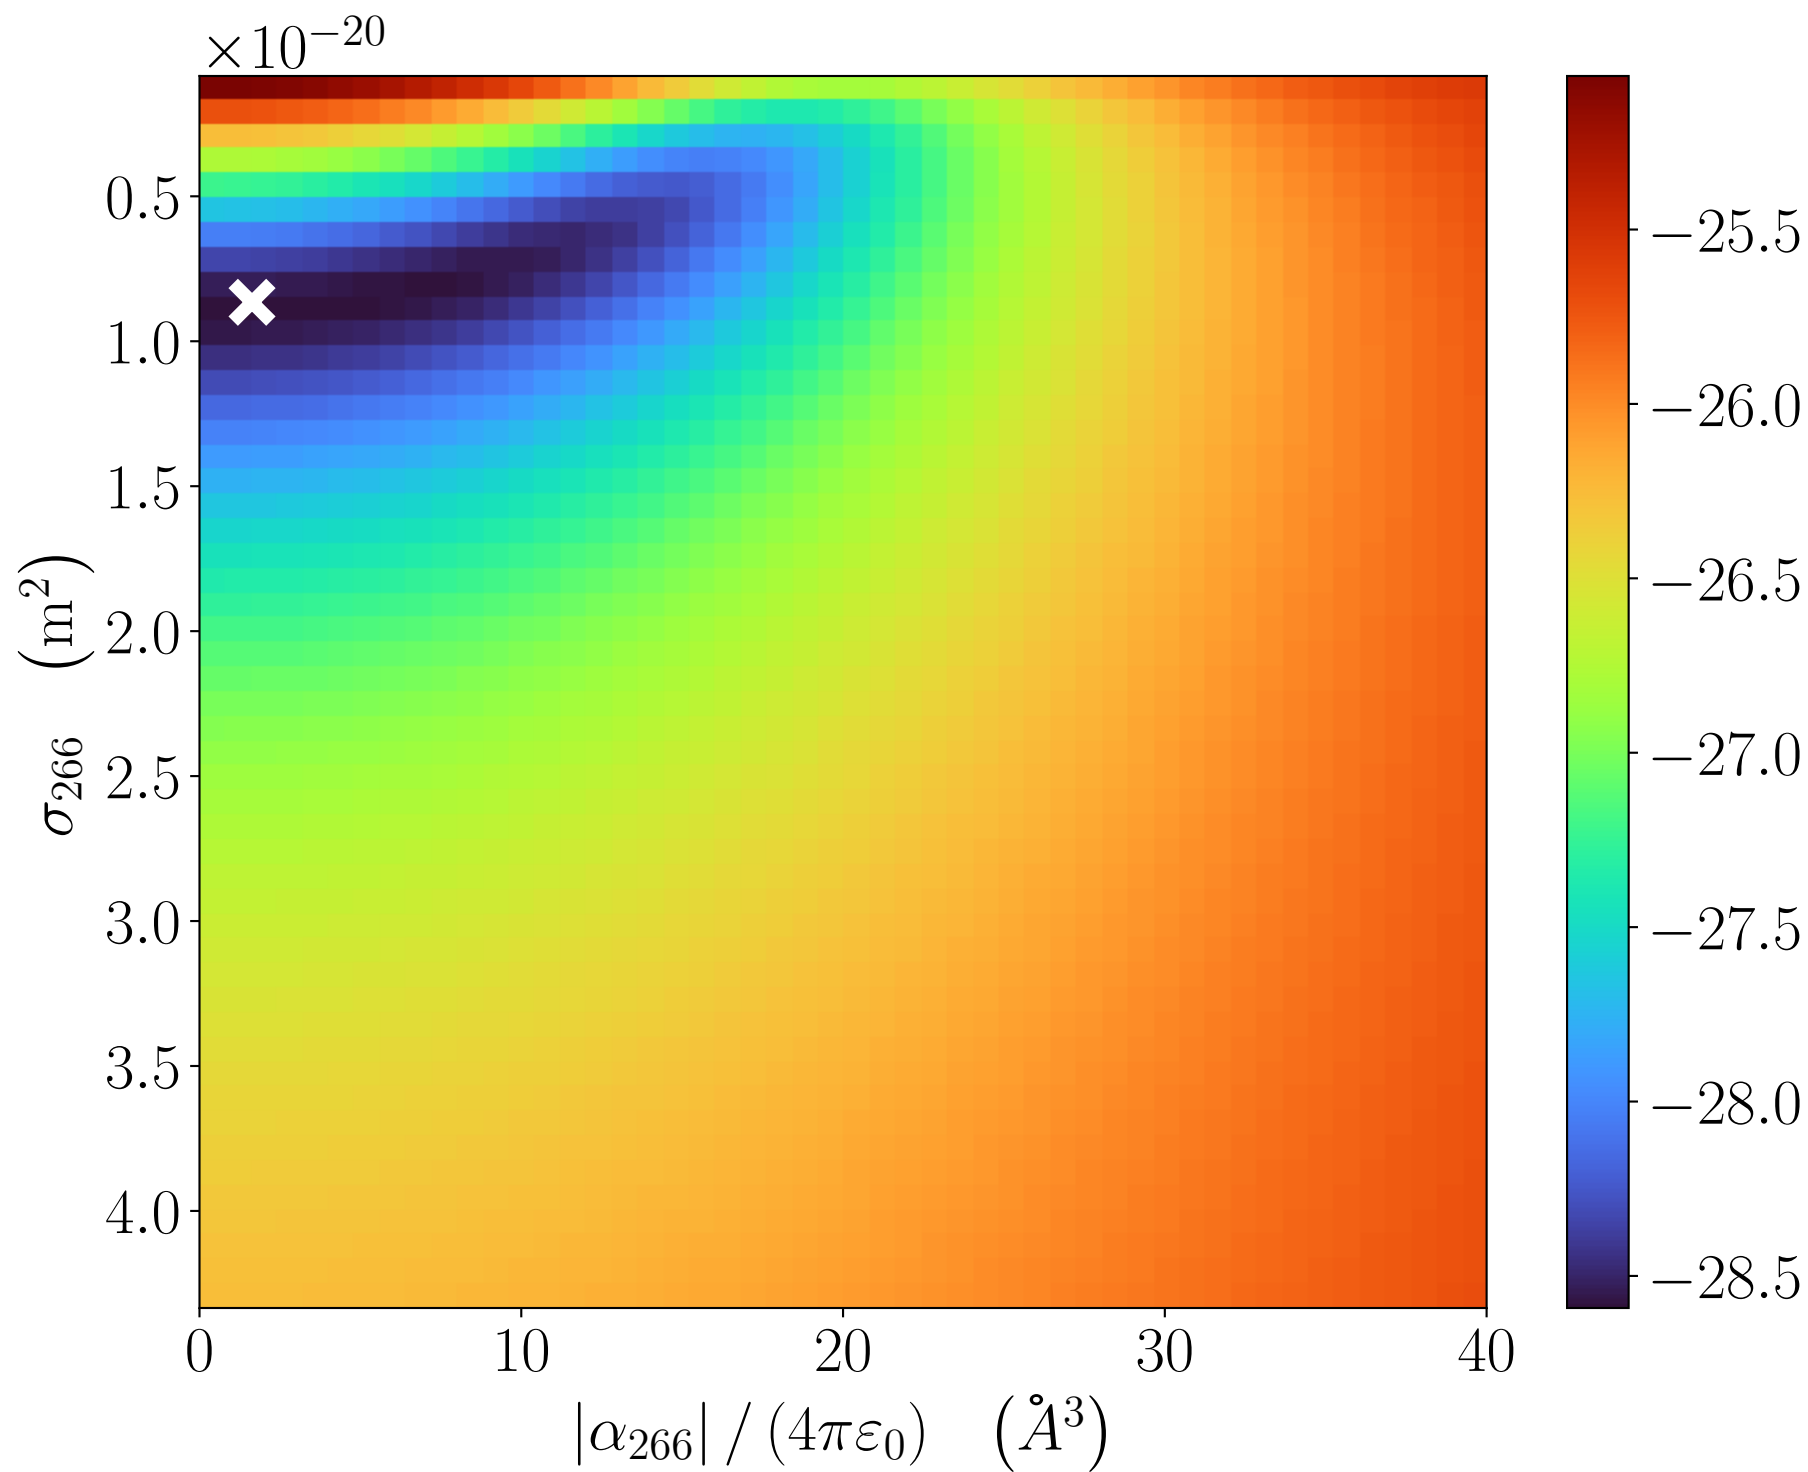

Supplement: d4cp03059a5.zip [file d4cp03059a5.zip]
